# Supplementary material for: In vivo activation of pH-responsive oxidase-like graphitic nanozymes for selective killing of Helicobacter pylori
Source: PubMed Central journal article supplement (PMC8012368; doi:10.1038/s41467-021-22286-x), 2021-03-31
Supplement: 41467_2021_22286_MOESM1_ESM.pdf [file 41467_2021_22286_MOESM1_ESM.pdf]

## Supplementary Information

### **In vivo activation of pH-responsive oxidase-like graphitic nanozymes for selective killing of *Helicobacter pylori***

Lufeng Zhang<sup>1</sup>, Liang Zhang<sup>1</sup>, Hui Deng<sup>1</sup>, Huan Li<sup>2</sup>, Wentao Tang<sup>1</sup>, Luyao Guan<sup>1</sup>, Ye Qiu<sup>1</sup>, Michael J Donovan<sup>1</sup>, Zhuo Chen<sup>1\*</sup> & Weihong Tan<sup>1,3</sup>

<sup>1</sup>Molecular Science and Biomedicine Laboratory, State Key Laboratory of Chemo/Bio-Sensing and Chemometrics, College of Chemistry and Chemical Engineering, College of Biology, Hunan Provincial Key Laboratory of Biomacromolecular Chemical Biology, Hunan University, Changsha, 410082, China

<sup>2</sup>Department of Gastroenterology, the Third Xiangya Hospital of Central South University, Changsha, 410013, China

<sup>3</sup>The Cancer Hospital of the University of Chinese Academy of Sciences, Institute of Basic Medicine and Cancer (IBMC), Chinese Academy of Sciences, Hangzhou, Zhejiang, 310022, China

These authors contributed equally: Lufeng Zhang, Liang Zhang.

\*E-mail: zhuochen@hnu.edu.cn

## Supplementary Figures

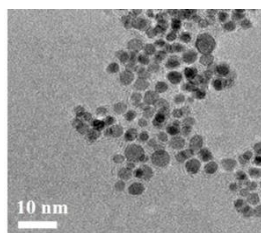

**Supplementary Figure 1.** TEM image of PtCo@G.

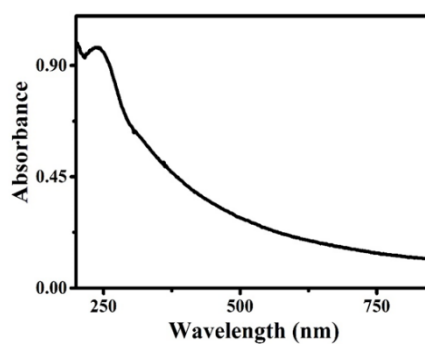

**Supplementary Figure 2.** UV-Vis absorbance of PtCo@G solution. Source data are provided as a Source Data file.

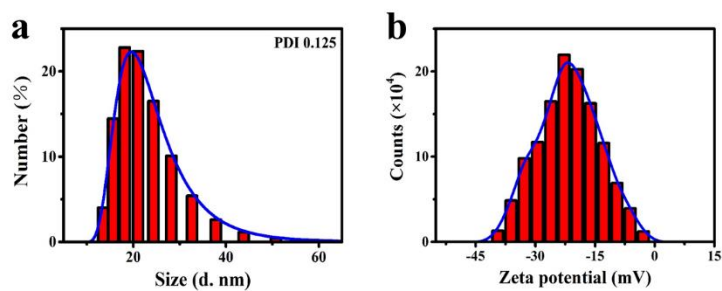

**Supplementary Figure 3. The characterization of PtCo@G.** (a) Hydrodynamic diameter and (b) Zeta potential of PtCo@G characterized by dynamic light scattering. Source data are provided as a Source Data file.

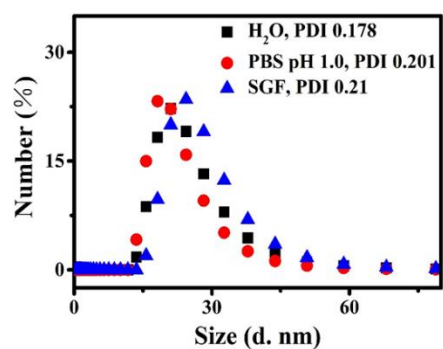

**Supplementary Figure 4.** Hydrodynamic diameter of PtCo@G in H<sub>2</sub>O, PBS (pH 1.0), and SGF after 12 h incubation. Source data are provided as a Source Data file.

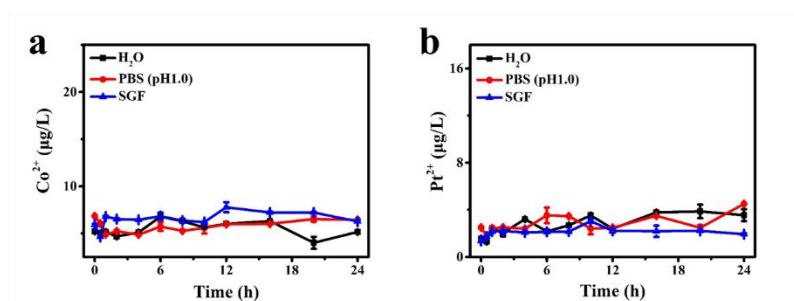

**Supplementary Figure 5.** The dissolution experiments of PtCo@G. Profiles for (a) Co<sup>2+</sup> and (b) Pt<sup>2+</sup> release from PtCo@G nanocrystals in H<sub>2</sub>O, PBS (pH 1.0) and SGF. The data indicate the means and SD from three parallel experiments. Source data are provided as a Source Data file.

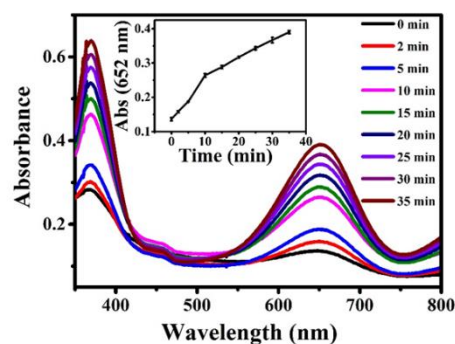

**Supplementary Figure 6.** Time-dependent absorbance spectra of TMB catalyzed by PtCo@G.

Source data are provided as a Source Data file.

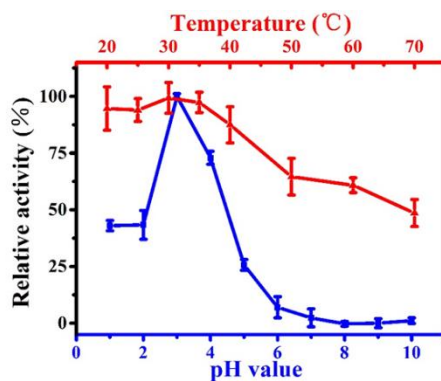

**Supplementary Figure 7.** The oxidase-like activity of PtCo@G is dependent on pH and temperature. The data indicate the means and SD from three parallel experiments. Source data are provided as a Source Data file.

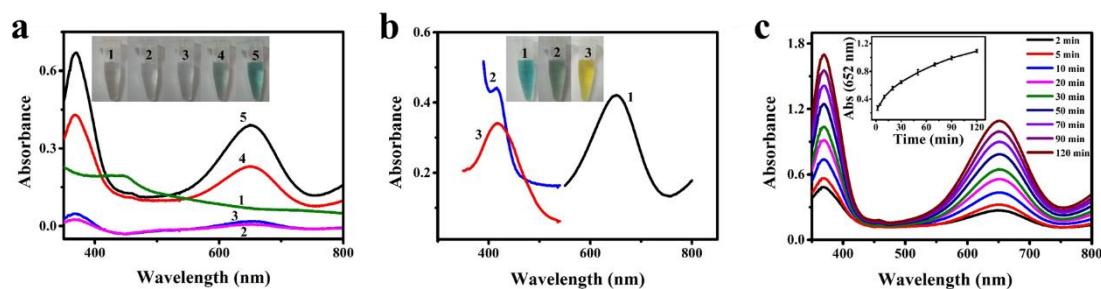

**Supplementary Figure 8. Peroxidase-like activity of PtCo@G nanocrystals.** (a) The UV-Vis absorbance spectra and visual color changes of TMB in different reaction systems: (1) PtCo@G, (2) TMB, (3) TMB+H<sub>2</sub>O<sub>2</sub>, (4) PtCo@G+TMB, and (5) PtCo@G+TMB+H<sub>2</sub>O<sub>2</sub> in a pH 4.0 PBS buffer after 10 min incubation. (b) PtCo@G catalyzes oxidation of various peroxidase substrates in the presence of H<sub>2</sub>O<sub>2</sub> to produce different color reactions. (1) TMB, (2) ABTS, (3) OPD. Insert images show corresponding visual color changes. (c) Time-dependent absorbance spectra of TMB catalyzed by PtCo@G in the presence of H<sub>2</sub>O<sub>2</sub>. Data are presented as means ± standard deviation (s.d.). Error bars were based on s.d. of three independent experiments. Source data are provided as a Source Data file.

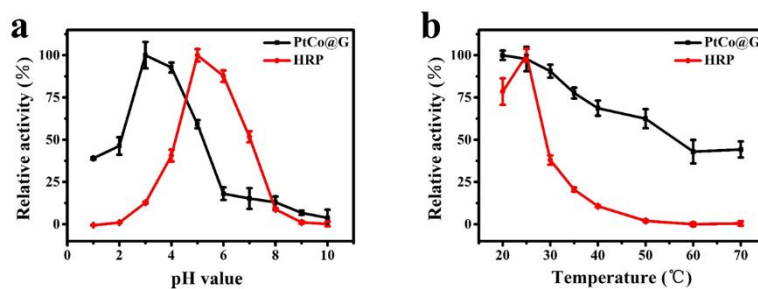

**Supplementary Figure 9. Peroxidase-like activity of PtCo@G nanocrystals.** (a) and (b) show that the peroxidase-like activity of PtCo@G is dependent on pH and temperature. Data are presented as means  $\pm$  s.d. Error bars were taken from three independent experiments. Source data are provided as a Source Data file.

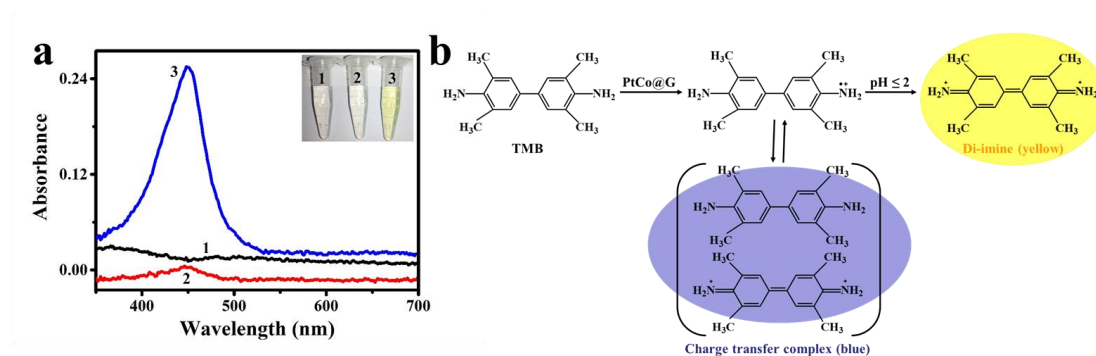

**Supplementary Figure 10. The catalytic oxidation of TMB by PtCo@G at strong acidic pH condition.** (a) Oxidase-like activity of the PtCo@G nanocrystals in PBS (pH 1.0) buffer: (1) PtCo@G, (2) TMB, (3) PtCo@G+TMB. Insert images show corresponding visual color changes. (b) The schematic illustration for catalytic oxidation process of TMB by PtCo@G. At weak acidic pH condition, TMB could be oxidized by the oxidase-like PtCo@G to produce blue colored charge transfer complexes. However, the oxidation of TMB in strong acidic pH yielded yellow di-imine products. Source data are provided as a Source Data file.

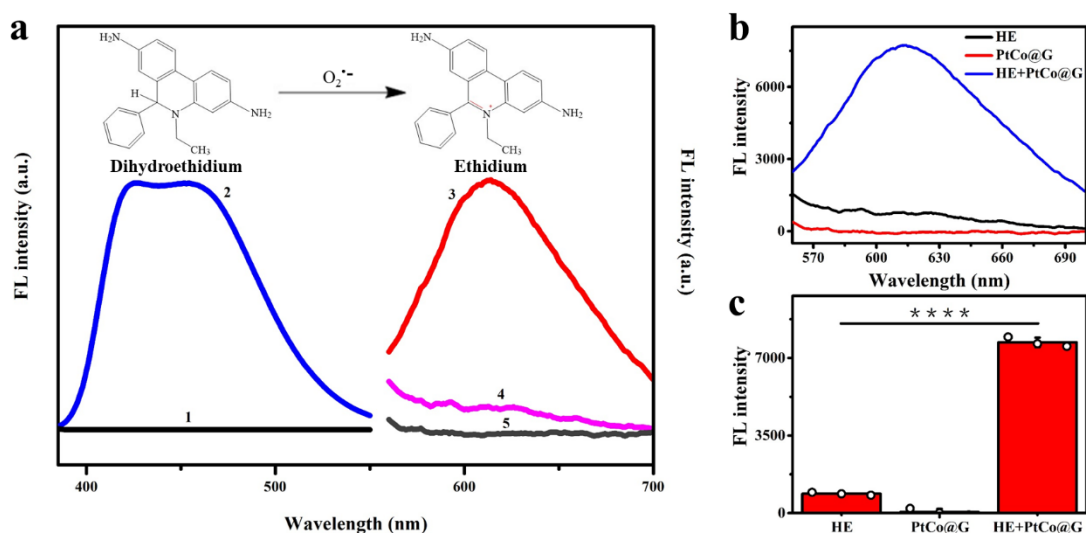

**Supplementary Figure 11. The characterization of the superoxide radical ( $O_2^{\bullet-}$ ) generation**

**during the oxidase-like activity of PtCo@G nanocrystals. (a)** Fluorescence spectra of

hydroethidine (HE) in different reaction systems: (1) PtCo@G+HE, (2) HE, (Excitation: 370 nm)

(3) PtCo@G+HE, (4) HE, (5) PtCo@G (Excitation: 535 nm) in pH 1.0 PBS buffer after 30 min

incubation. Insert shows the reaction of HE as a fluorescence probe for trapping the superoxide

radical ( $O_2^{\bullet-}$ ). **(b)** Fluorescence spectra of hydroethidine (HE) before and after the addition of

PtCo@G nanocrystals. **(c)** Histograms of FL intensity show the fluorescence product ethidium

catalyzed by PtCo@G nanocrystals. *P* values were calculated by the Student's two-sided *t* test:

\*\*\*\**p* < 0.0001. Data are presented as means  $\pm$  s.d. Error bars were taken from three independent

experiments. Source data are provided as a Source Data file.

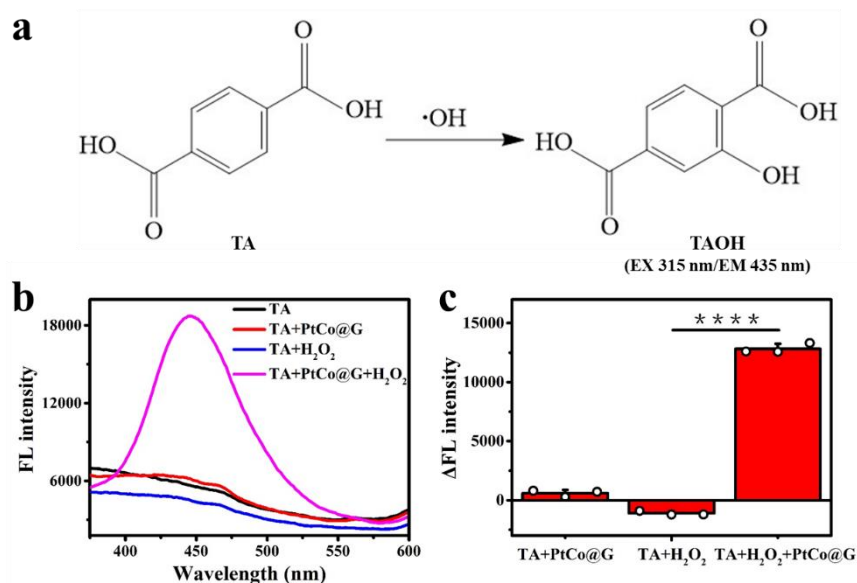

**Supplementary Figure 12. The characterization of the hydroxyl radical ( $\cdot\text{OH}$ ) generation during the peroxidase-like activity of PtCo@G nanocrystals. (a) The reaction between terephthalic acid (TA) and hydroxyl radical ( $\cdot\text{OH}$ ). The fluorescence product is 2-hydroxyterephthalic acid (TAOH). (b) Fluorescence spectra of the PBS (pH 1.0) solution include only TA; TA and PtCo@G; TA and H<sub>2</sub>O<sub>2</sub>; TA, PtCo@G and H<sub>2</sub>O<sub>2</sub>. (c) Histograms of  $\Delta\text{FL}$  intensity show the fluorescence product, 2-hydroxyterephthalic acid (TAOH) catalyzed by PtCo@G nanocrystals.  $P$  values were calculated by the Student's two-sided  $t$  test: \*\*\*\* $p < 0.0001$ . Data are presented as means  $\pm$  s.d. Error bars were taken from three independent experiments. Source data are provided as a Source Data file.**

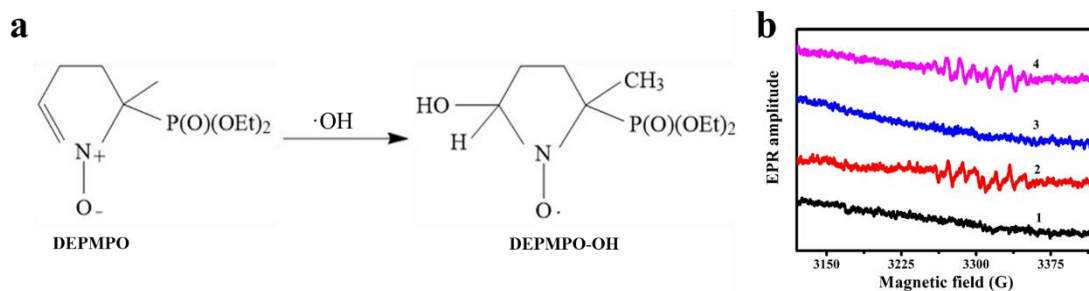

**Supplementary Figure 13. The characterization of the hydroxyl radical ( $\bullet\text{OH}$ ) generation during the peroxidase-like activity of PtCo@G nanocrystals. (a) The reaction of DEPMPPO trapping hydroxyl radical ( $\bullet\text{OH}$ ). (b) EPR spectra of DEPMPPO-OH obtained by trapping  $\bullet\text{OH}$  with the spin-trap agent DEPMPPO in different reaction systems: (1)  $\text{Fe}^{2+} + \text{H}_2\text{O}_2$ , (2)  $\text{Fe}^{2+} + \text{H}_2\text{O}_2 + \text{DEPMPPO}$ , (3)  $\text{PtCo@G} + \text{H}_2\text{O}_2$ , (4)  $\text{PtCo@G} + \text{H}_2\text{O}_2 + \text{DEPMPPO}$  in pH 1.0 PBS buffer.**

Source data are provided as a Source Data file.

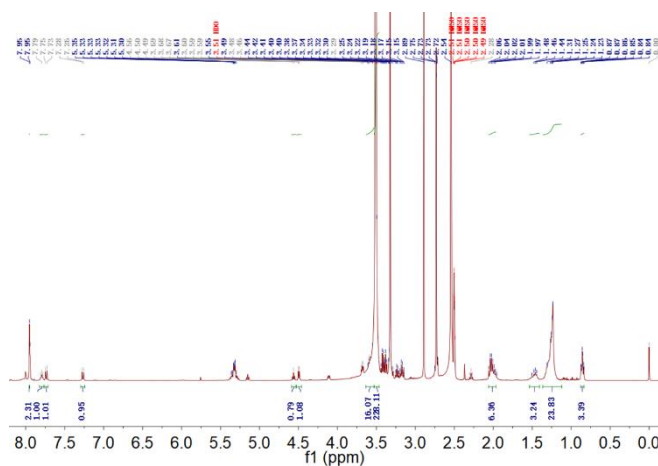

**Supplementary Figure 14.  $^1\text{H}$ -NMR characterization of  $\text{C}_{18}\text{-PEG}_n\text{-Benzeneboronic acid (CPB)}$  with MQ 400 MHz. Source data are provided as a Source Data file.**



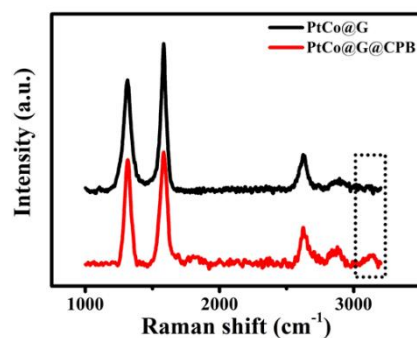

**Supplementary Figure 15.** Raman spectra characterization of CPB functionalized PtCo@G.

Source data are provided as a Source Data file.

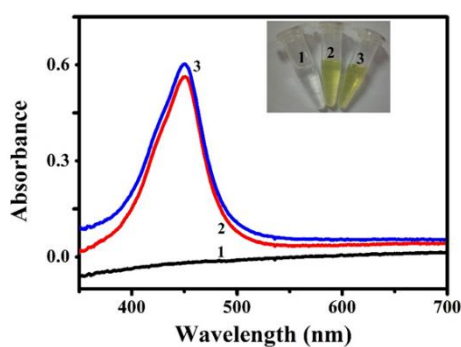

**Supplementary Figure 16.** The oxidase-like property comparison of PtCo@G and PtCo@G@CPB

in SGF: (1) TMB, (2) PtCo@G+TMB, (3) PtCo@G@CPB+TMB. Insert images show corresponding visual color changes. Source data are provided as a Source Data file.

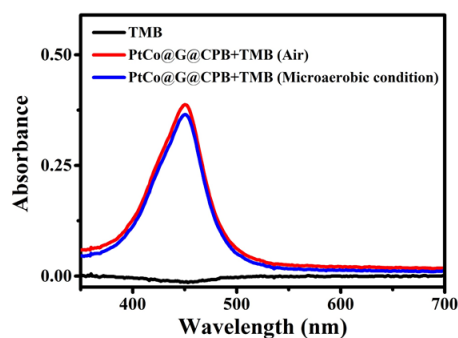

**Supplementary Figure 17.** The comparison of oxidase-like activity of PtCo@G@CPB in SGF

under air and microaerobic atmosphere. Source data are provided as a Source Data file.

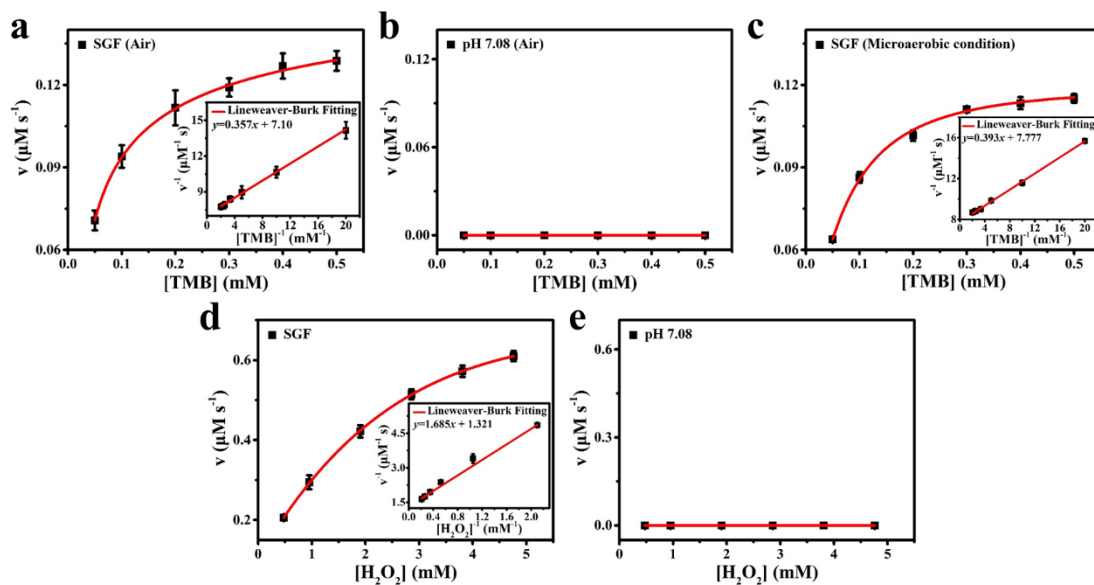

**Supplementary Figure 18. The enzyme kinetics of PtCo@G@CPB.** Kinetics for (a), (b), (c) oxidase-like and (d), (e) peroxidase-like activities of PtCo@G@CPB. The data indicate the means and SD from three parallel experiments. Source data are provided as a Source Data file.

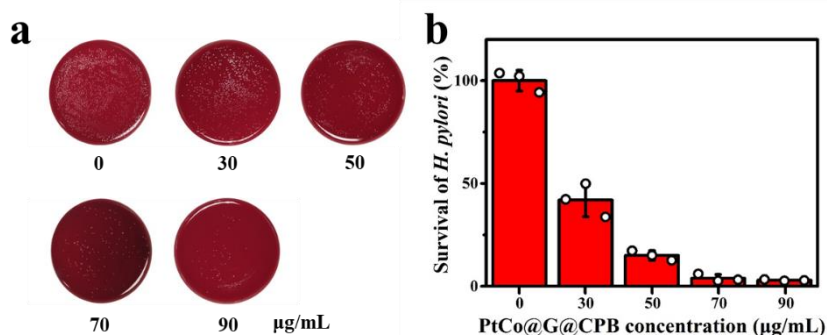

**Supplementary Figure 19. The dose-activity test in vitro.** (a) Photographs of *H. pylori* colonies under treatment with different concentrations of PtCo@G@CPB. (b) The antibacterial activity of PtCo@G@CPB at different concentrations against *H. pylori*. The data indicate the means and SD from three parallel experiments. Source data are provided as a Source Data file.

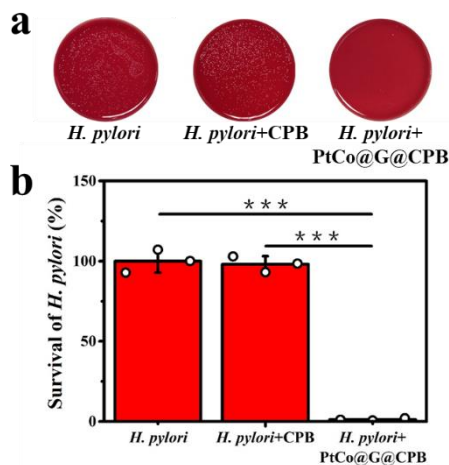

**Supplementary Figure 20. The antibacterial activity of PtCo@G@CPB against *H. pylori*.** (a) Photographs of *H. pylori* colonies under different treatments. (b) The bacterial activity of *H. pylori* under different treatments. The amounts of CPB molecules in the experimental groups of *H. pylori* + CPB and *H. pylori* + PtCo@G@CPB (70 µg/mL) are same. *P* values were calculated by the Student's two-sided *t* test: \*\*\**p* < 0.001. The data indicate the means and SD from three parallel experiments. Source data are provided as a Source Data file.

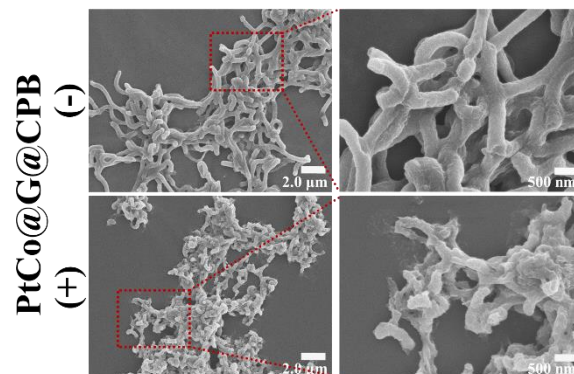

**Supplementary Figure 21. SEM images of *H. pylori* treatment without or with PtCo@G@CPB.**

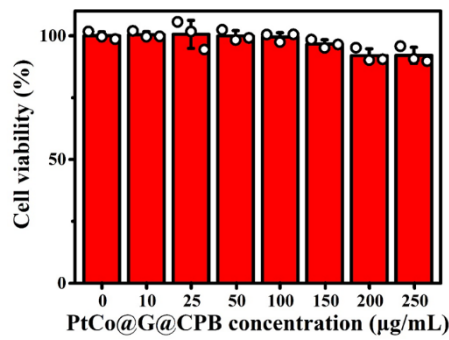

**Supplementary Figure 22.** Cytotoxicity assay of PtCo@G@CPB. The data indicate the means and SD from three parallel experiments. Source data are provided as a Source Data file.

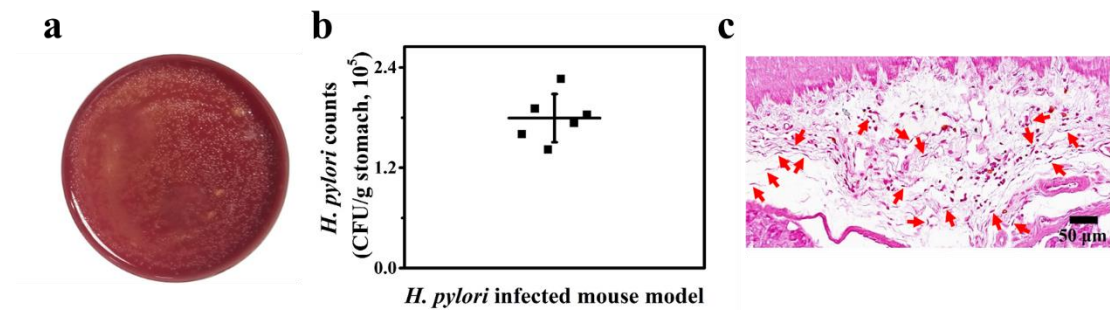

**Supplementary Figure 23.** Characterization of *H. pylori*-infected mouse model. (a) Photographs of *H. pylori* colonies after gastric mucosa reculture. (b) Quantification of bacterial burden in the stomach of *H. pylori*-infected mouse. Data are presented as mean  $\pm$  SD (n=6 biologically independent mice). (c) The gram staining of a slice from the gastric mucosa of *H. pylori*-infected mouse. Slice thickness, 5 µm. Red arrows point to bacteria. Source data are provided as a Source Data file.

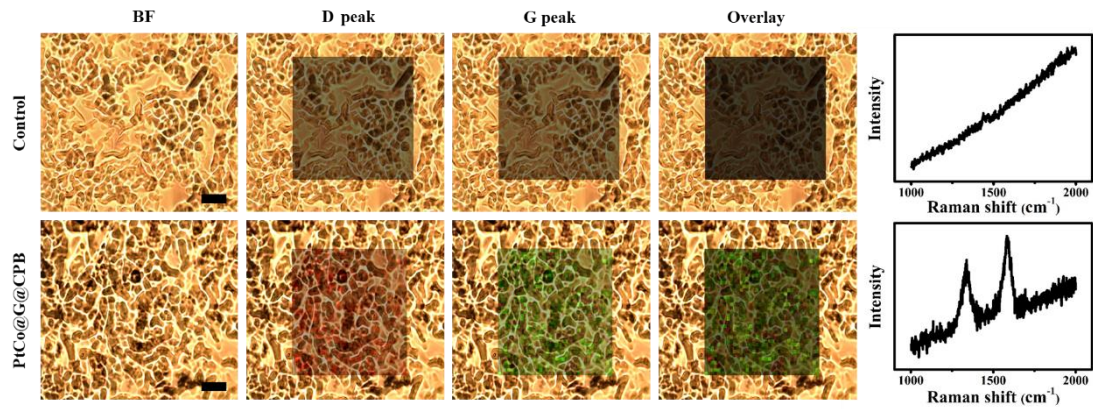

**Supplementary Figure 24.** Raman imaging and spectra of slice from the gastric mucosa. Scale bar:

20  $\mu\text{m}$ , Slice thickness, 5  $\mu\text{m}$ . Source data are provided as a Source Data file.

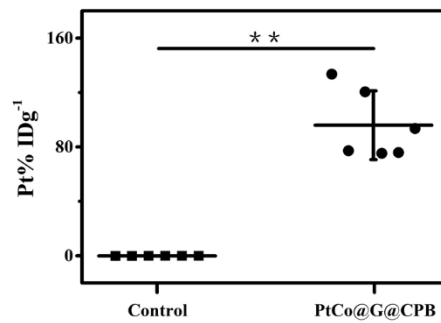

**Supplementary Figure 25.** The distribution of PtCo@G@CPB in the stomach of *H. pylori*-infected mouse. Data are presented as mean  $\pm$  SD (n=6 biologically independent mice). *P* values were calculated by the Student's two-sided *t* test: \*\**p* < 0.01. Source data are provided as a Source Data file.

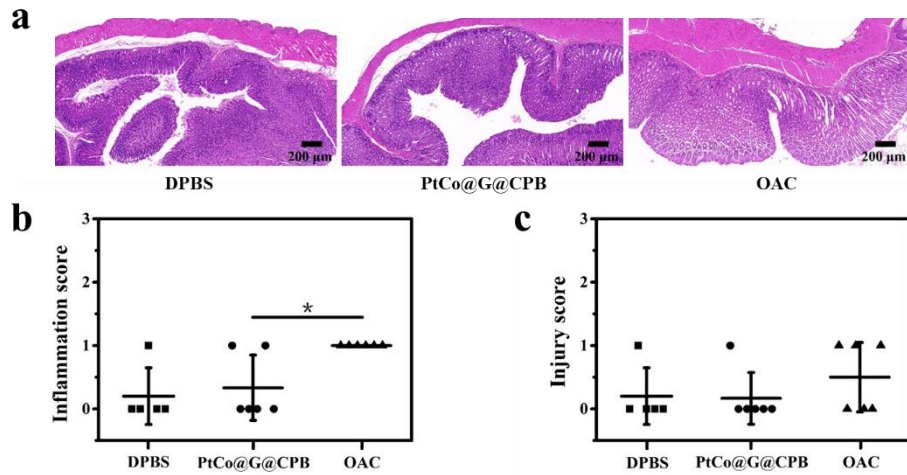

**Supplementary Figure 26. The characterization of PtCo@G@CPB toxicity in vivo.** (a) H&E staining of slice from the gastric mucosa after treatment with DPBS, PtCo@G@CPB and OAC. Slice thickness, 5  $\mu$ m. The inflammation score (b) and injury score (c) of gastric mucosa, according to the images of H&E staining. Data are presented as mean  $\pm$  SD (DPBS: n=5, PtCo@G@CPB and OAC: n=6 biologically independent mice). *P* values were calculated by the Student's two-sided *t* test: \**p* = 0.0101. Source data are provided as a Source Data file.

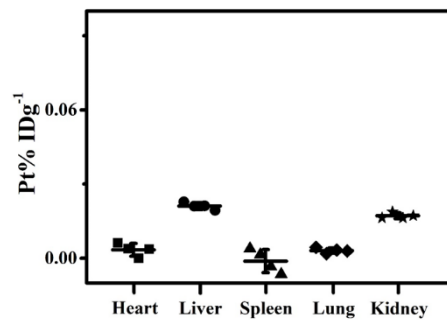

**Supplementary Figure 27. The distribution of PtCo@G@CPB in organs after treatment.** Data are presented as mean  $\pm$  SD (n=4 biologically independent mice). Source data are provided as a Source Data file.

## Supplementary Tables

**Supplementary Table 1.** The Michaelis-Menten constant ( $K_m$ ) and maximal reaction velocity ( $V_{max}$ )

for the oxidase-like activity of PtCo@G@CPB with TMB as the substrate.

| Catalyst   | Substrate | $K_m$ (mM) | $V_{max}$ ( $\mu\text{M s}^{-1}$ ) | Reaction condition           |
|------------|-----------|------------|------------------------------------|------------------------------|
| PtCo@G@CPB | TMB       | 0.0503     | 0.141                              | SGF (Air)                    |
| PtCo@G@CPB | TMB       | 0.0505     | 0.129                              | SGF (Microaerobic condition) |
| PtCo@G@CPB | TMB       | ND         | ND                                 | pH 7.08 (Air)                |

ND: not detected. The concentration of PtCo@G@CPB was 21.265  $\mu\text{g/mL}$ .

**Supplementary Table 2.** The Michaelis-Menten constant ( $K_m$ ) and maximal reaction velocity ( $V_{max}$ )

for the peroxidase-like activity of PtCo@G@CPB with  $\text{H}_2\text{O}_2$  as the substrate.

| Catalyst   | Substrate              | $K_m$ (mM) | $V_{max}$ ( $\mu\text{M s}^{-1}$ ) | Reaction condition |
|------------|------------------------|------------|------------------------------------|--------------------|
| PtCo@G@CPB | $\text{H}_2\text{O}_2$ | 1.276      | 0.757                              | SGF                |
| PtCo@G@CPB | $\text{H}_2\text{O}_2$ | ND         | ND                                 | pH 7.08            |

ND: not detected. The concentration of PtCo@G@CPB was 21.265  $\mu\text{g/mL}$ .

**Supplementary Table 3.** Sequences of the primers used for quantitative real-time PCR.

| Primer name | Primer sequence            | Note           |
|-------------|----------------------------|----------------|
| Bac16s8F    | 5-AGAGAGTTTGATCCTGGCTCAG-3 | Forward primer |
| Bac16s338R  | 5-CATTACCGCGGCTGCTGG-3     | Reverse primer |
